# Supplementary material
Source: publisher figshare collection journal article supplement (https://springernature.figshare.com/ndownloader/files/13168934)
Supplement: Supplementary file 1 [file 13168934]

Supplementary Fig.1

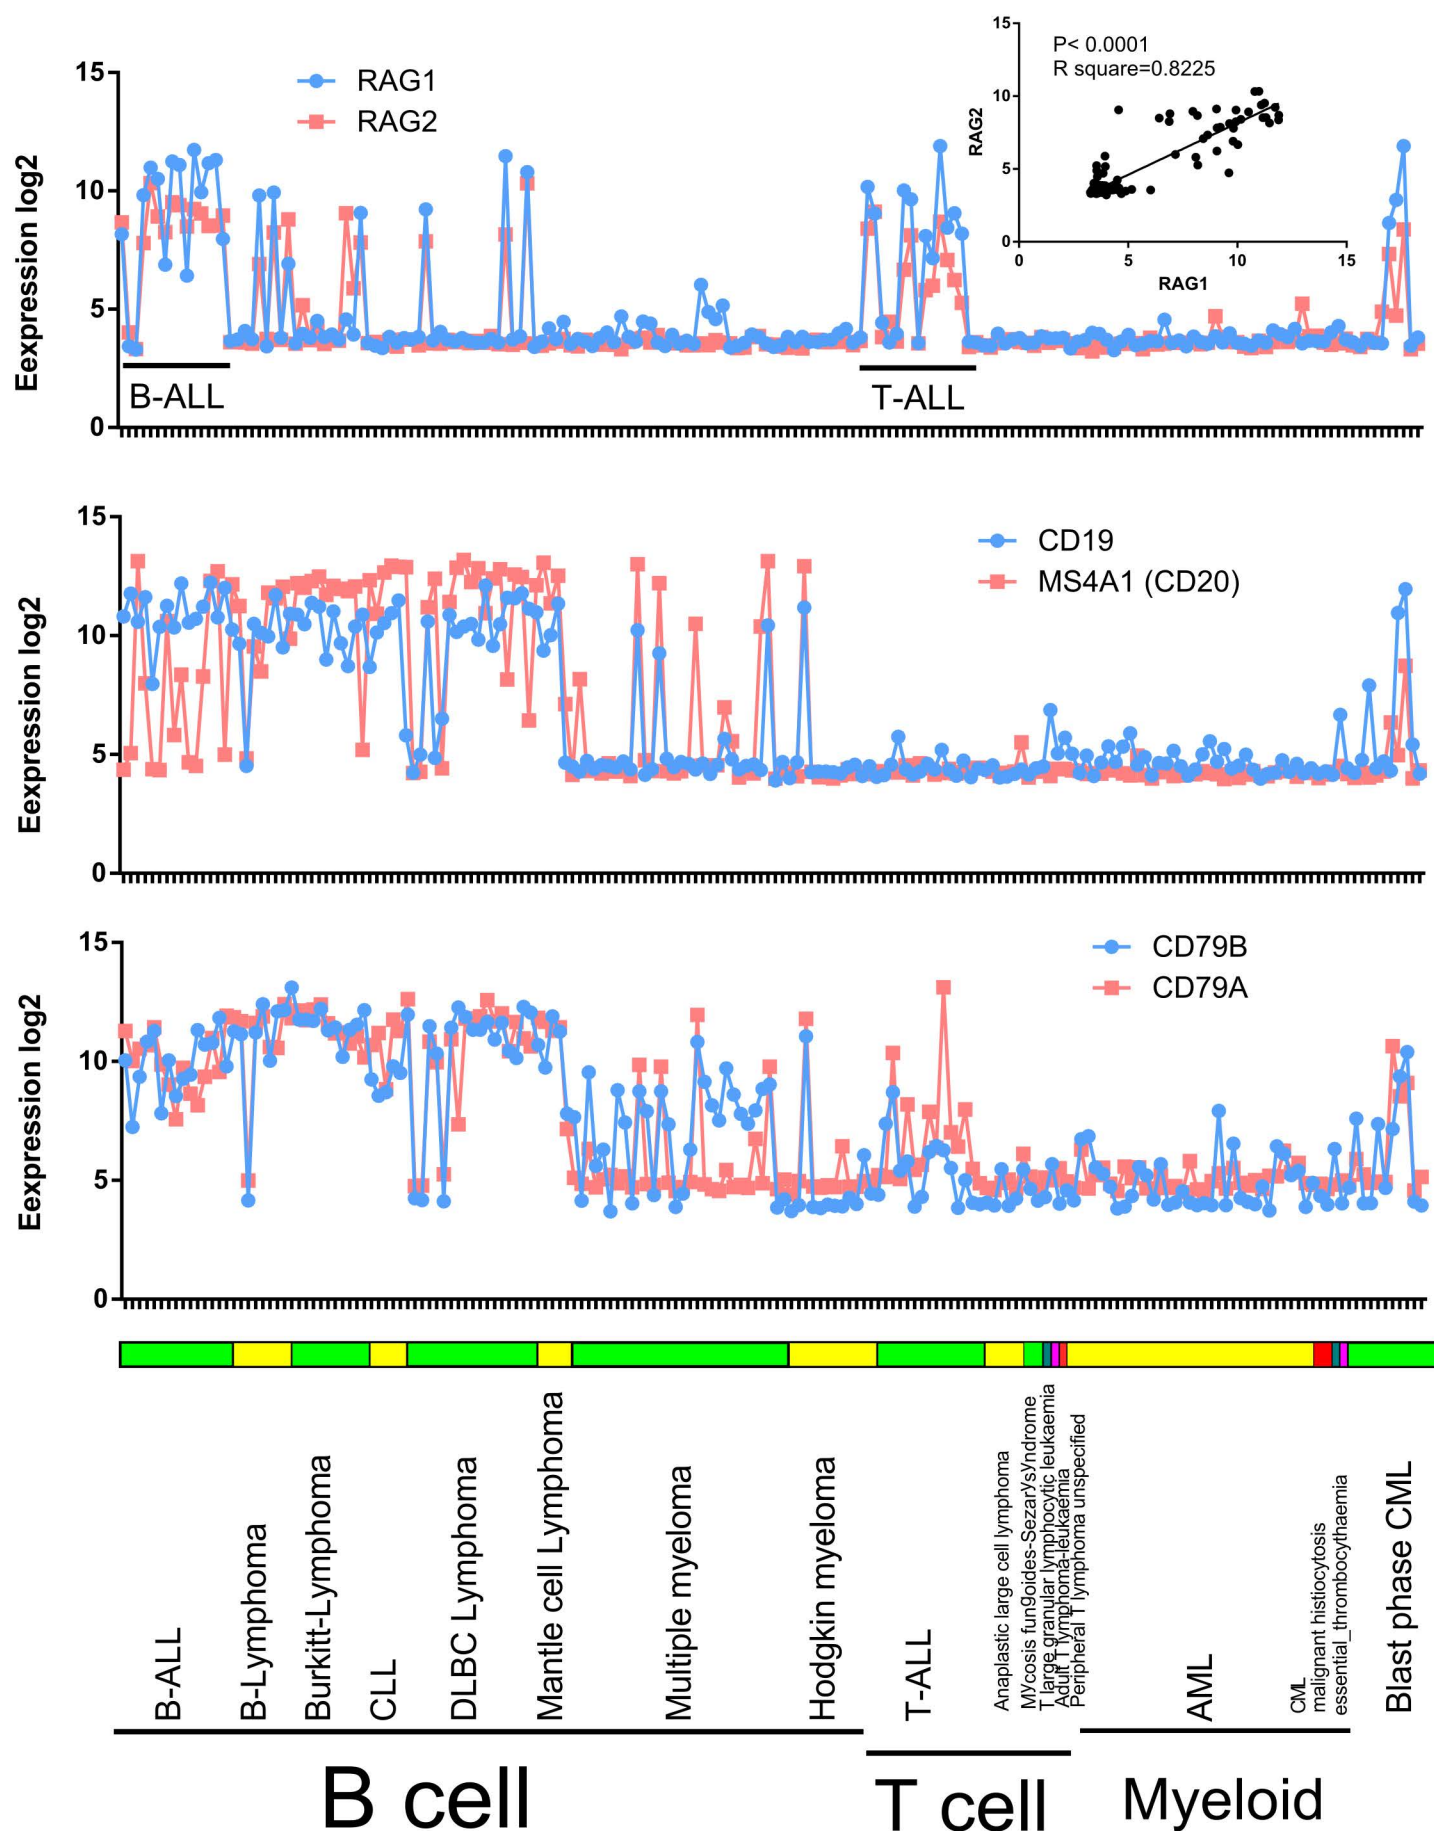

Supplementary Figure 2

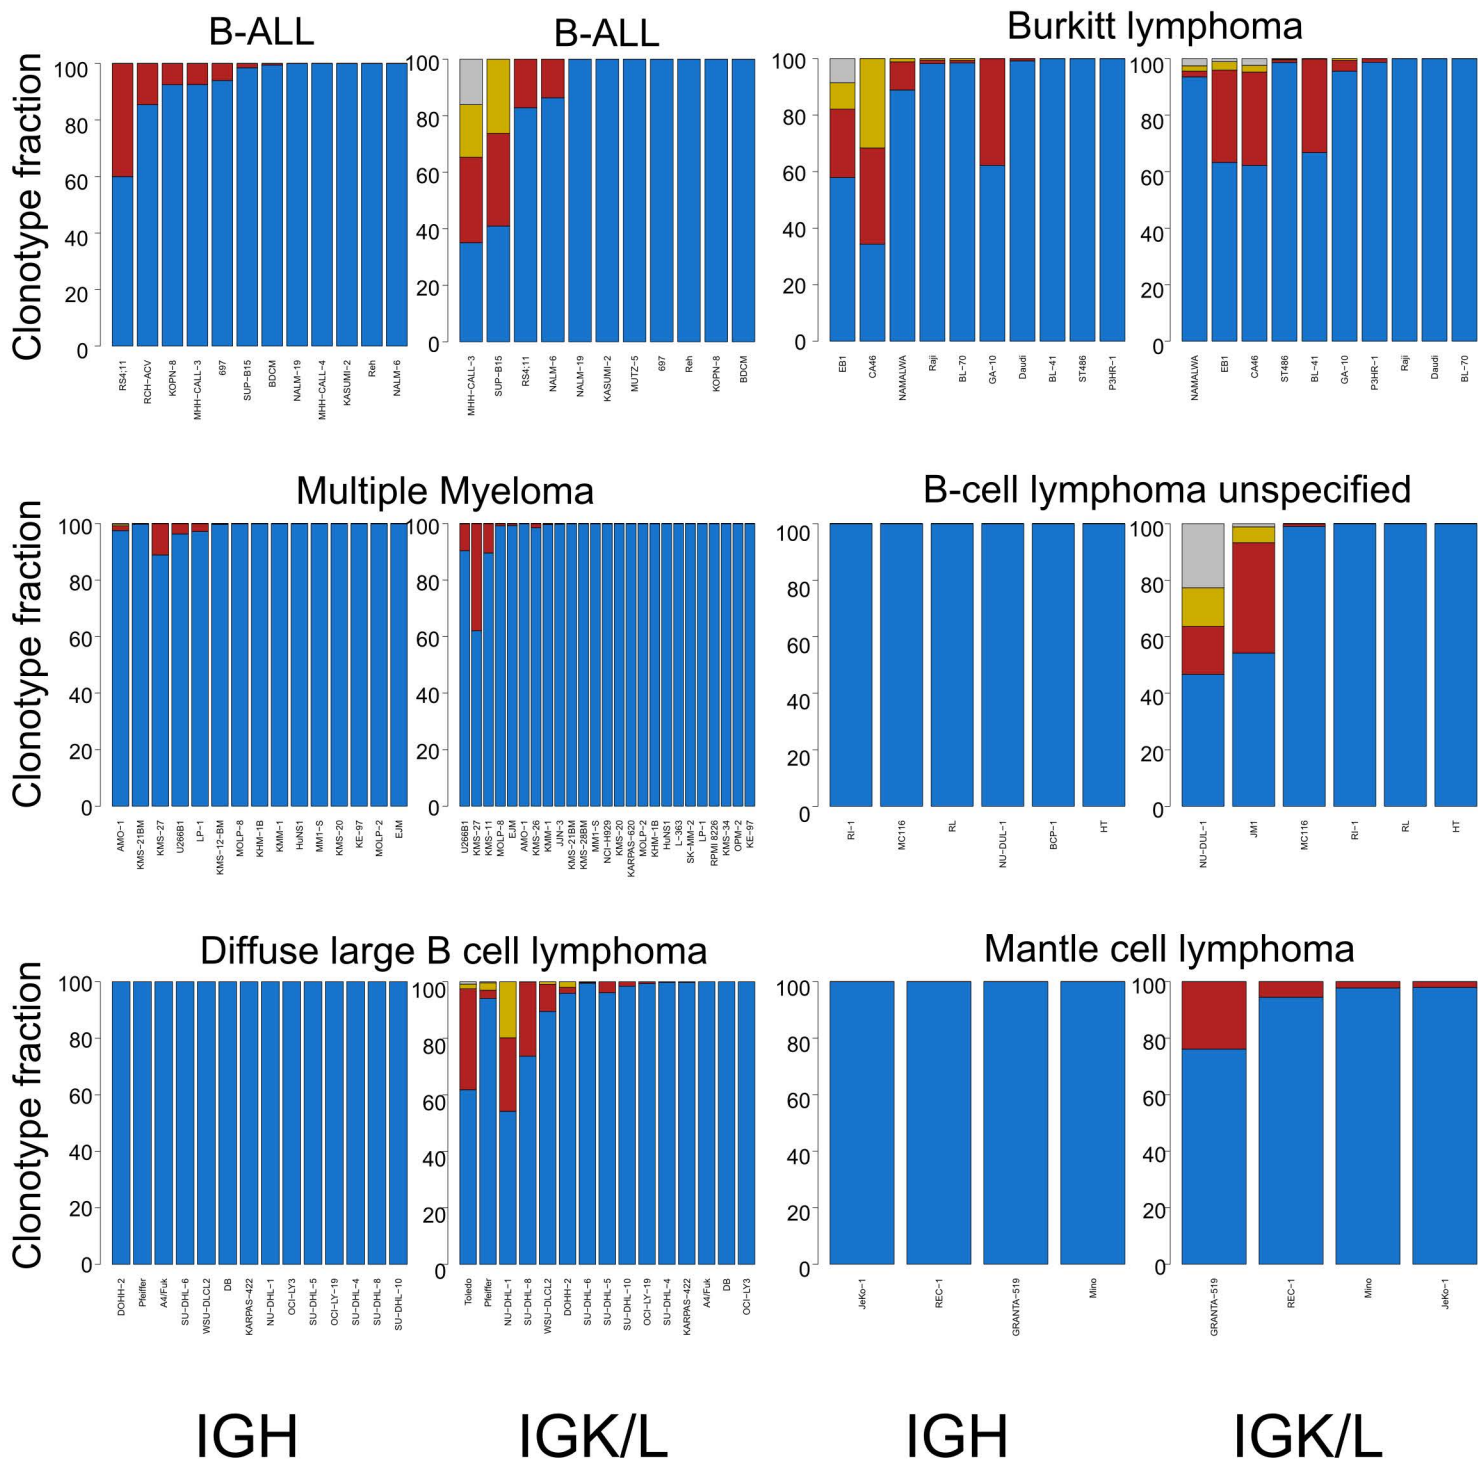

Supplementary Figure 3

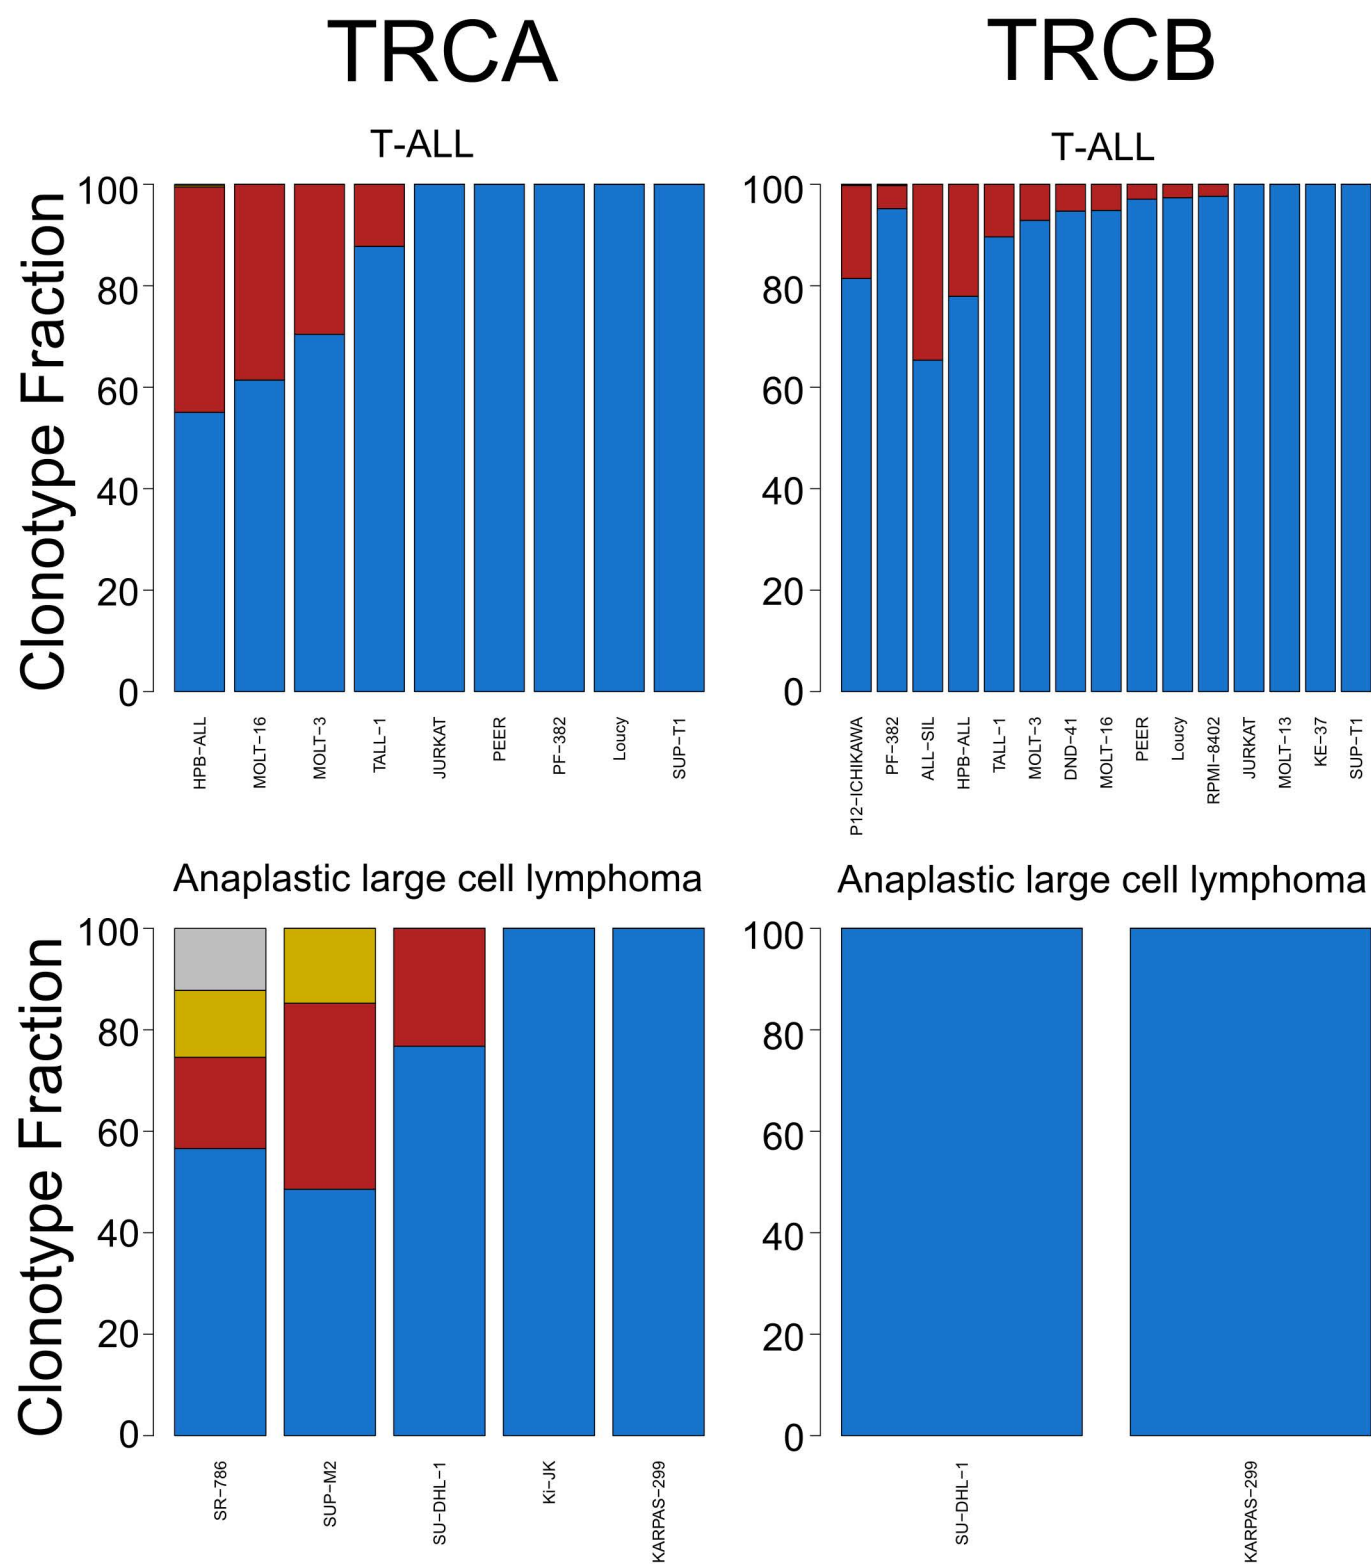

Supplementary Figure 4

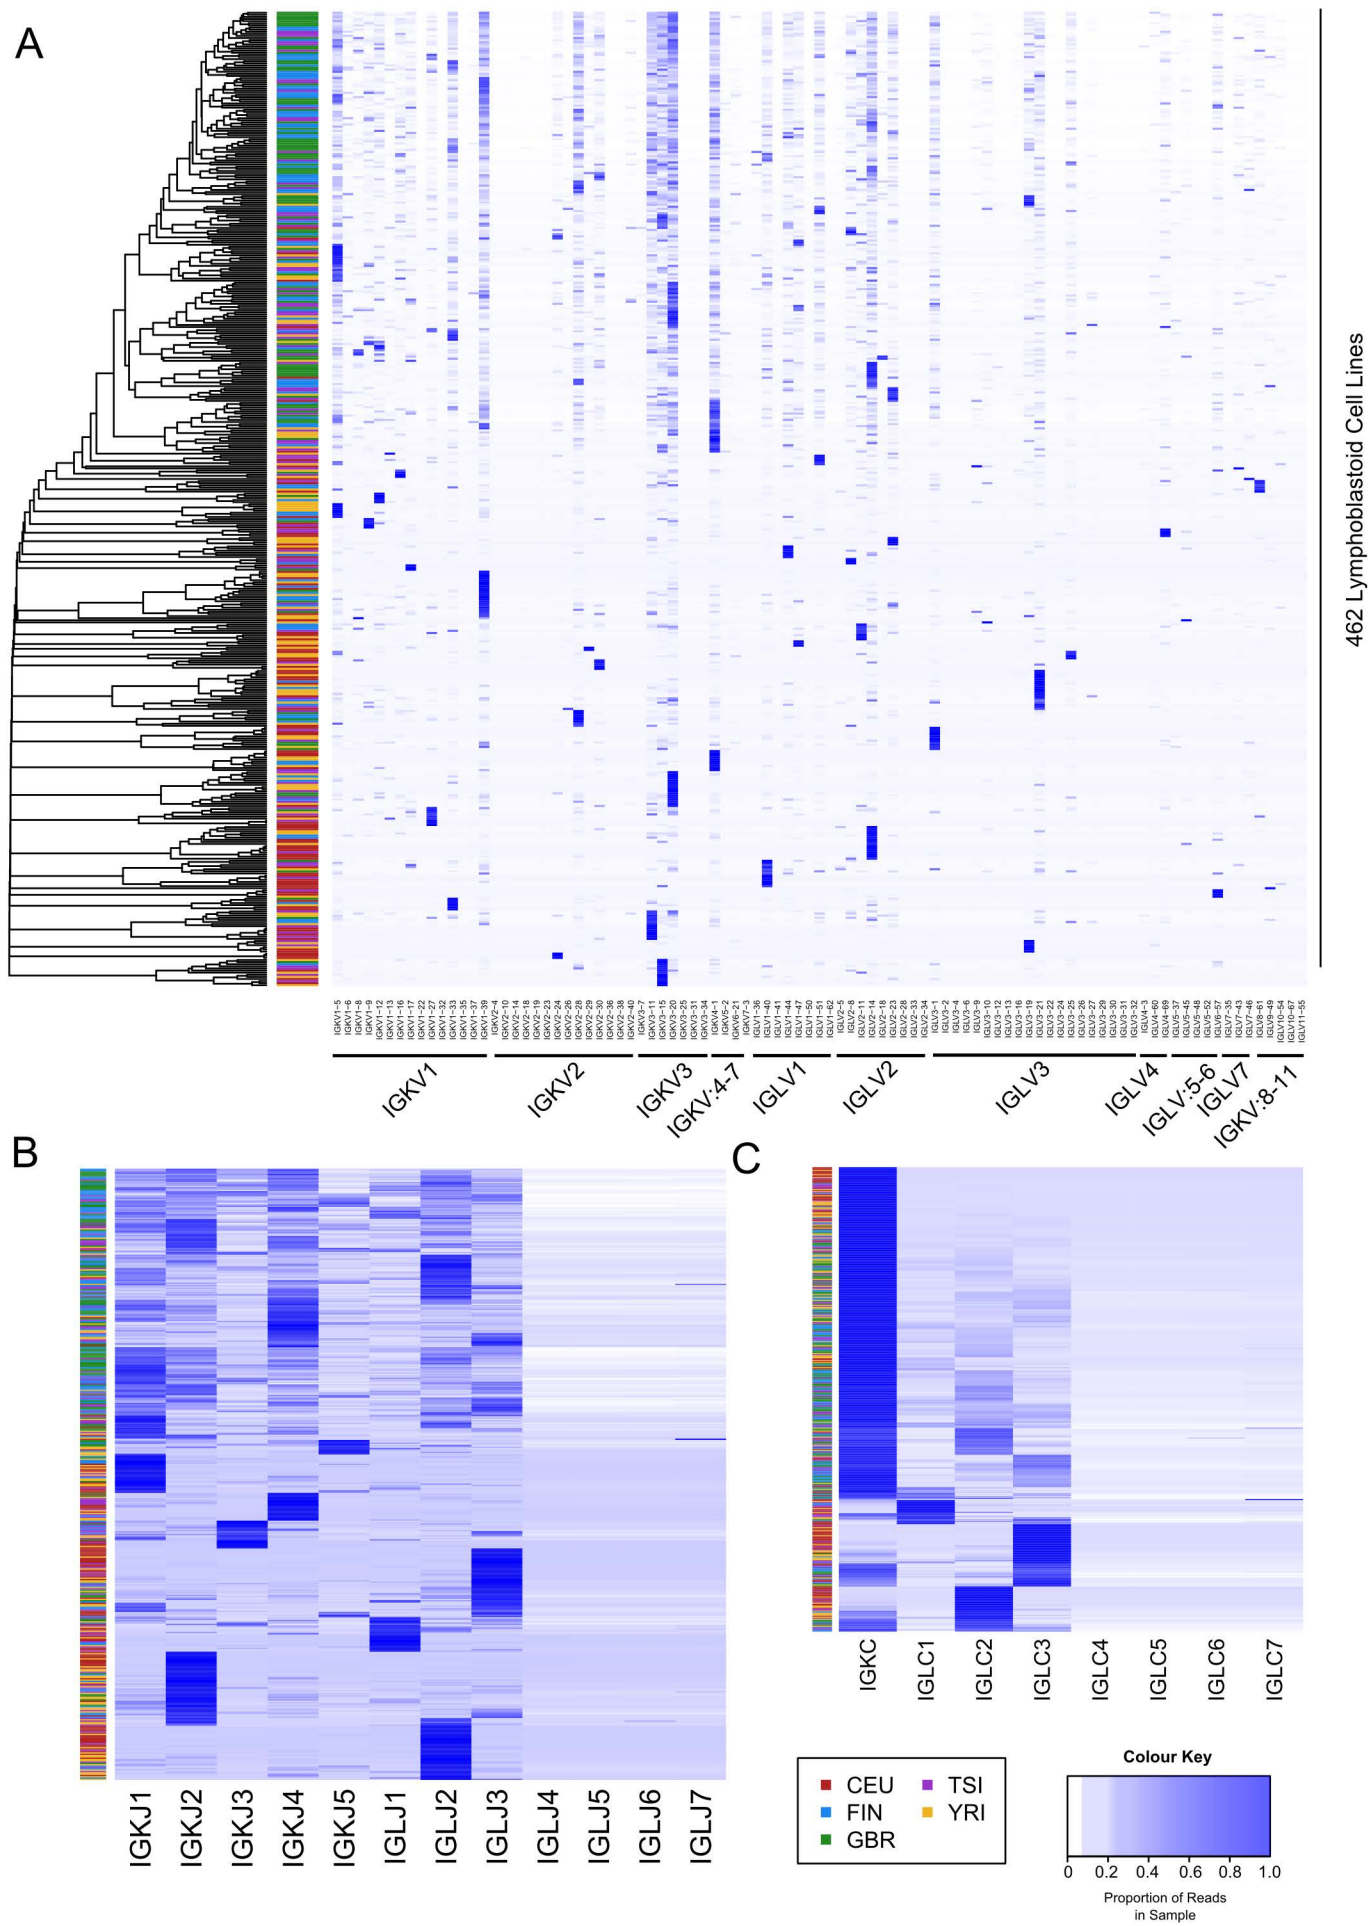

## Supplementary Figure 5

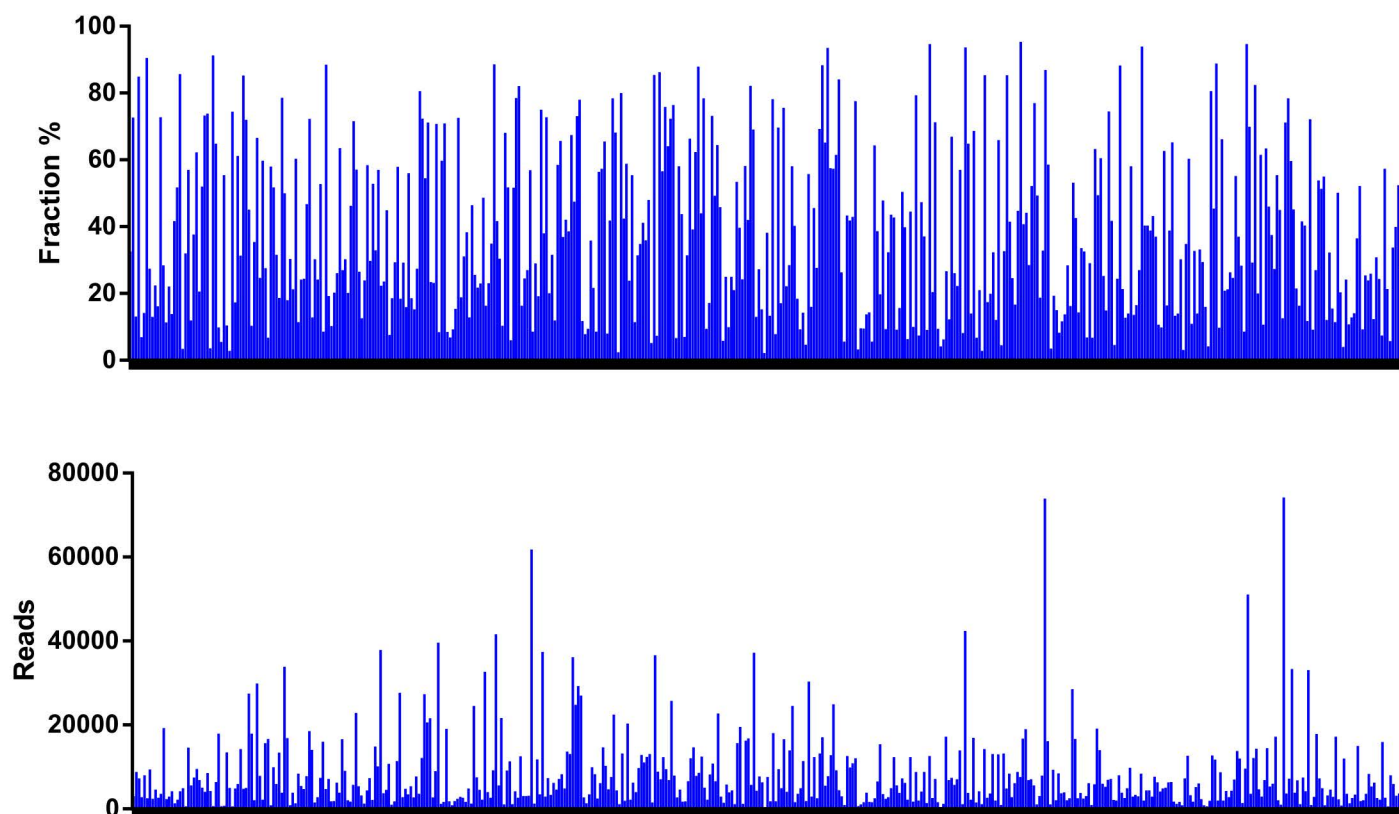

The dominant rearrangement of 462 EBV transformed B lymphocyte cell lines
